# Supplementary material for: Repurposing Niclosamide as a Therapeutic Drug against Acute Liver Failure by Suppressing Ferroptosis
Source: MDPI journal article supplement (doi:10.3390/pharmaceutics15071950), 2023-07-14
Supplement: s1 [file s1]

# Supplementary Material: Repurposing Niclosamide as a Therapeutic Drug for Acute Liver Failure

Xiao Zhong, Xue-Gong Fan and Ruochan Chen

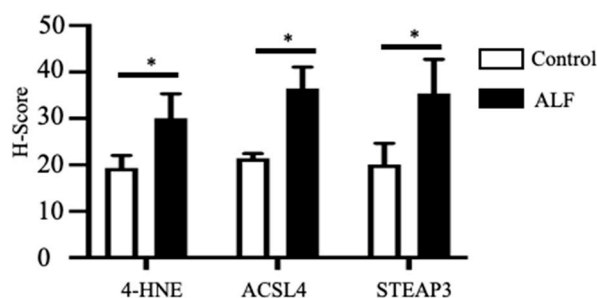

**Supplementary Figure S1.** H score of ferroptosis biomarker in control group and patients with ALF. Quantification of positive area and intensity in liver paraffin section stained with 4-HNE/ACSL4/STEAP3 antibody. (n=3 per group).

**Supplementary Table S1.** Accession information of four mRNA expression profiling datasets associated with ALF. GSE14668 (HBV), GSE96851 (HBV) and GSE120652 (APAP) were used for DEGs identification and GSE38941 (HBV) for validation.

| Accession No. | Platform | Etiology | Sample size<br>Case/Control | Organism     | Experiment type               | Country | Public<br>year |
|---------------|----------|----------|-----------------------------|--------------|-------------------------------|---------|----------------|
| GSE14668      | GPL570   | HBV      | 8/20                        | Homo sapiens | Expression profiling by array | USA     | 2010           |
| GSE96851      | GPL570   | HBV      | 17/10                       | Homo sapiens | Expression profiling by array | Italy   | 2018           |
| GSE120652     | GPL6244  | APAP     | 3/3                         | Homo sapiens | Expression profiling by array | USA     | 2020           |
| GSE38941      | GPL570   | HBV      | 16/10                       | Homo sapiens | Expression profiling by array | USA     | 2012           |

**Supplementary Table S2.** qPCR primers.

| Genes        | Forward                   | Reverse                   |
|--------------|---------------------------|---------------------------|
| Gapdh        | AGGTCGGTGTGAACGGATTTG     | TGTAGACCATGTAGTTGAGGTCA   |
| Tnfa         | CATCTTCTCAAAATTCGAGTGACAA | TGGGAGTAGACAAGGTACAACCC   |
| Il-1 $\beta$ | GCCTTGGGCCTCAAAGGAAAGAATC | GGAAGACACAGATTCCATGGTGAAG |
| Il-6         | AGCCAGAGTCCTTCAGA         | GGTCCTTAGCCACTCCT         |
| Tgf- $\beta$ | CTCCCGTGGCTTCTAGTGC       | GCCTTAGTTTGGACAGGATCTG    |
| Stmn1        | GCCAGTCTCTTGTCTTCTGTT     | CCTCCCGTTTCTCTTGTGTTAG    |
| Nox1         | GCACAGCTTCCACACTTTC       | CTCTCAGGTCGGCCAAG         |
| Ptgs2        | GTCATTGGTGGAGAGGTGTATC    | CAGGAGGATGGAGTTGTTGTAG    |

**Supplementary Table S3.** Clinical information of case and control group (n=3 per group). Data are presented as mean  $\pm$  SEM. \*p<0.05, 2-tailed unpaired Student's t test.

| Clinical parameters           | ALF          | Control    |
|-------------------------------|--------------|------------|
| Sex (M/F)                     | 2/1          | 2/1        |
| Age (years)                   | 40.3± 3.3    | 45.3± 4.1  |
| Total bilirubin (umol/L)      | 463.9± 20.9* | 28.2± 5.6  |
| Alanine transaminase (U/L)    | 188.4± 10.1* | 31.9± 4.5  |
| Prothrombin time activity (%) | 15.9± 1.3*   | 103.9± 2.5 |

**Supplementary Table S4.** Specific ferroptosis regulator and marker genes ranked by log [FC] value in each GEO dataset. Genes regarding ferroptosis retrieved from ferroptosis database.

| Accession                |         | GSE14668 (HBV) |        |          | GSE96851 (HBV) |          | GSE120652 (APAP) |        |
|--------------------------|---------|----------------|--------|----------|----------------|----------|------------------|--------|
| Ferroptosis related DEGs | Up      |                | Down   |          | Up             | Down     | Up               | Down   |
|                          | RRM2    | SRC            | TFR2   | CEBPG    | RRM2           | TFR2     | STMN1            | TFR2   |
|                          | SLC7A11 | TP63           | CDO1   | GCLC     | NQO1           | CDO1     | CAPG             | SCP2   |
|                          | NQO1    | ZFP69B         | NNMT   | LPCAT3   | NCF2           | ALB      | HELLS            | CDO1   |
|                          | G6PD    | MAP1LC3A       | GLS2   | GCH1     | CAPG           | HAMP     | NCF2             | PEBP1  |
|                          | CAPG    | JDP2           | CXCL2  | DRD4     | SLC7A11        | TF       | FANCD2           | MT1G   |
|                          | HELLS   | PML            | ALB    | TUBE1    | CD44           | GLS2     | DDIT4            | NNMT   |
|                          | CD44    | TGFBR1         | SCD    | EGFR     | ALOX5          | STEAP3   | AURKA            | TUBE1  |
|                          | RB1     | CYBB           | HAMP   | FH       | TXNIP          | NNMT     | NQO1             | EGFR   |
|                          | TXNIP   | STMN1          | TF     | SNX4     | TLR4           | CXCL2    | ACSL4            | STAT3  |
|                          | NCF2    | NFE2L2         | HNF4A  | TRIB3    | ABCC1          | HNF4A    | RRM2             | HAMP   |
|                          | RGS4    | GDF15          | STEAP3 | ZEB1     | AURKA          | CBS      | CAV1             | PSAT1  |
|                          | TAZ     | ACSL4          | PLIN4  | LPIN1    | FANCD2         | VEGFA    | SLC38A1          | PCK2   |
|                          | FANCD2  | HIC1           | DPP4   | ARNTL    | RGS4           | PSAT1    | CD44             | VEGFA  |
|                          | SLC2A6  | SQSTM1         | VEGFA  | KRAS     | HMOX1          | MT1G     |                  | DPP4   |
|                          | ASNS    | SLC7A5         | PROM2  | HSPA5    | GDF15          | BNIP3    |                  | SCD    |
|                          | ATM     | HMOX1          | CBS    | ACO1     | HELLS          | GOT1     |                  | STEAP3 |
|                          | ALOX5   | FTH1           | BNIP3  | STAT3    | CYBB           | SCP2     |                  | LPIN1  |
|                          | TLR4    | CDKN2A         | MT1G   | PCK2     | G6PD           | LPCAT3   |                  | BNIP3  |
|                          | AURKA   | HMGB1          | TFRC   | HSD17B11 | ASNS           | CEBPG    |                  | GLS2   |
|                          | MYB     | SLC38A1        | SCP2   | CISD2    | CAV1           | EGFR     |                  | LPCAT3 |
|                          | MUC1    | NF2            | GPX2   | PRDX6    | SLC2A3         | GCLC     |                  | TF     |
|                          | ABCC1   | ENPP2          | PEBP1  | ANO6     | ENPP2          | SCD      |                  | GCLC   |
|                          | PGD     | SLC3A2         | PSAT1  | ARRDC3   | FTH1           | GCH1     |                  | GOT1   |
|                          | KLHL24  | ULK2           | PRKAA1 | ALOX12B  | SLC38A1        | PEBP1    |                  | GCH1   |
|                          | CAV1    | ATG7           | DUOX1  | ELAVL1   | STMN1          | GPT2     |                  | GPT2   |
|                          | SAT1    | YWHAE          | GOT1   |          | JDP2           | PRKAA1   |                  | ACO1   |
|                          | JUN     | CA9            |        |          | MAPK1          | TUBE1    |                  | ZFP36  |
|                          | SLC2A3  | MAPK3          |        |          | ACSL4          | SOCS1    |                  | ARRDC3 |
|                          | FLT3    | SRXN1          |        |          | TSC22D3        | DPP4     |                  | ALB    |
|                          |         |                |        |          | KLHL24         | STAT3    |                  |        |
|                          |         |                |        |          | TGFBR1         | GPX2     |                  |        |
|                          |         |                |        |          | SLC2A6         | TRIB3    |                  |        |
|                          |         |                |        |          | MYB            | LPIN1    |                  |        |
|                          |         |                |        |          | ATM            | HSPA5    |                  |        |
|                          |         |                |        |          | SAT1           | ARNTL    |                  |        |
|                          |         |                |        |          | RB1            | PLIN4    |                  |        |
|                          |         |                |        |          | HMGB1          | SNX4     |                  |        |
|                          |         |                |        |          | PROM2          | FH       |                  |        |
|                          |         |                |        |          | PRKAA2         | HSD17B11 |                  |        |
|                          |         |                |        |          |                | ACO1     |                  |        |
|                          |         |                |        |          |                | CISD2    |                  |        |

**Supplementary Table S5.** SwissTargetPrediction for niclosamide.

| Target    | Uniprot ID    | ChEMBL ID     | Probability* | Known actives (3D/2D) |
|-----------|---------------|---------------|--------------|-----------------------|
| STAT3     | P40763        | CHEMBL4026    | 1            | 1 / 2                 |
| KCNMA1    | Q12791        | CHEMBL4304    | 0.130791955  | 11 / 19               |
| SAE1 UBA2 | Q9UBE0 Q9UBT2 | CHEMBL2095174 | 0.097874534  | 2 / 0                 |
| PIK3CG    | P48736        | CHEMBL3267    | 0.097874534  | 8 / 0                 |
| KDM4E     | B2RXH2        | CHEMBL1293226 | 0.097874534  | 2 / 0                 |
| KDM5C     | P41229        | CHEMBL2163176 | 0.097874534  | 1 / 0                 |
| KDM4A     | O75164        | CHEMBL5896    | 0.097874534  | 1 / 0                 |
| KDM4D     | Q6B0I6        | CHEMBL6138    | 0.097874534  | 1 / 0                 |
| PIK3CA    | P42336        | CHEMBL4005    | 0.097874534  | 5 / 0                 |
| PTGS1     | P23219        | CHEMBL221     | 0.097874534  | 4 / 3                 |
| PTGS2     | P35354        | CHEMBL230     | 0.097874534  | 6 / 2                 |
| PTK6      | Q13882        | CHEMBL4601    | 0.097874534  | 2 / 0                 |
| FADS1     | O60427        | CHEMBL5840    | 0.097874534  | 0 / 10                |
| DHFR      | P00374        | CHEMBL202     | 0.097874534  | 2 / 0                 |
| DHODH     | Q02127        | CHEMBL1966    | 0.097874534  | 19 / 0                |
| MAPK14    | Q16539        | CHEMBL260     | 0.097874534  | 5 / 7                 |
| CES2      | O00748        | CHEMBL3180    | 0.097874534  | 1 / 0                 |
| TTR       | P02766        | CHEMBL3194    | 0.097874534  | 4 / 0                 |
| CNOT7     | Q9UIV1        | CHEMBL3616361 | 0.097874534  | 4 / 0                 |
| ERCC5     | P28715        | CHEMBL4736    | 0.097874534  | 19 / 0                |
| FEN1      | P39748        | CHEMBL5027    | 0.097874534  | 28 / 0                |
| PDK1      | Q15118        | CHEMBL4766    | 0.097874534  | 0 / 96                |
| PLAT      | P00750        | CHEMBL1873    | 0.097874534  | 0 / 21                |
| F10       | P00742        | CHEMBL244     | 0.097874534  | 0 / 31                |
| PLAU      | P00749        | CHEMBL3286    | 0.097874534  | 0 / 53                |
